# Supplementary material for: Fine-Mapping Resolves Eae23 into Two QTLs and Implicates ZEB1 as a Candidate Gene Regulating Experimental Neuroinflammation in Rat
Source: PubMed Central journal article supplement (PMC2939884; doi:10.1371/journal.pone.0012716), 2010-09-15

# Supplementary Figure 2

A)

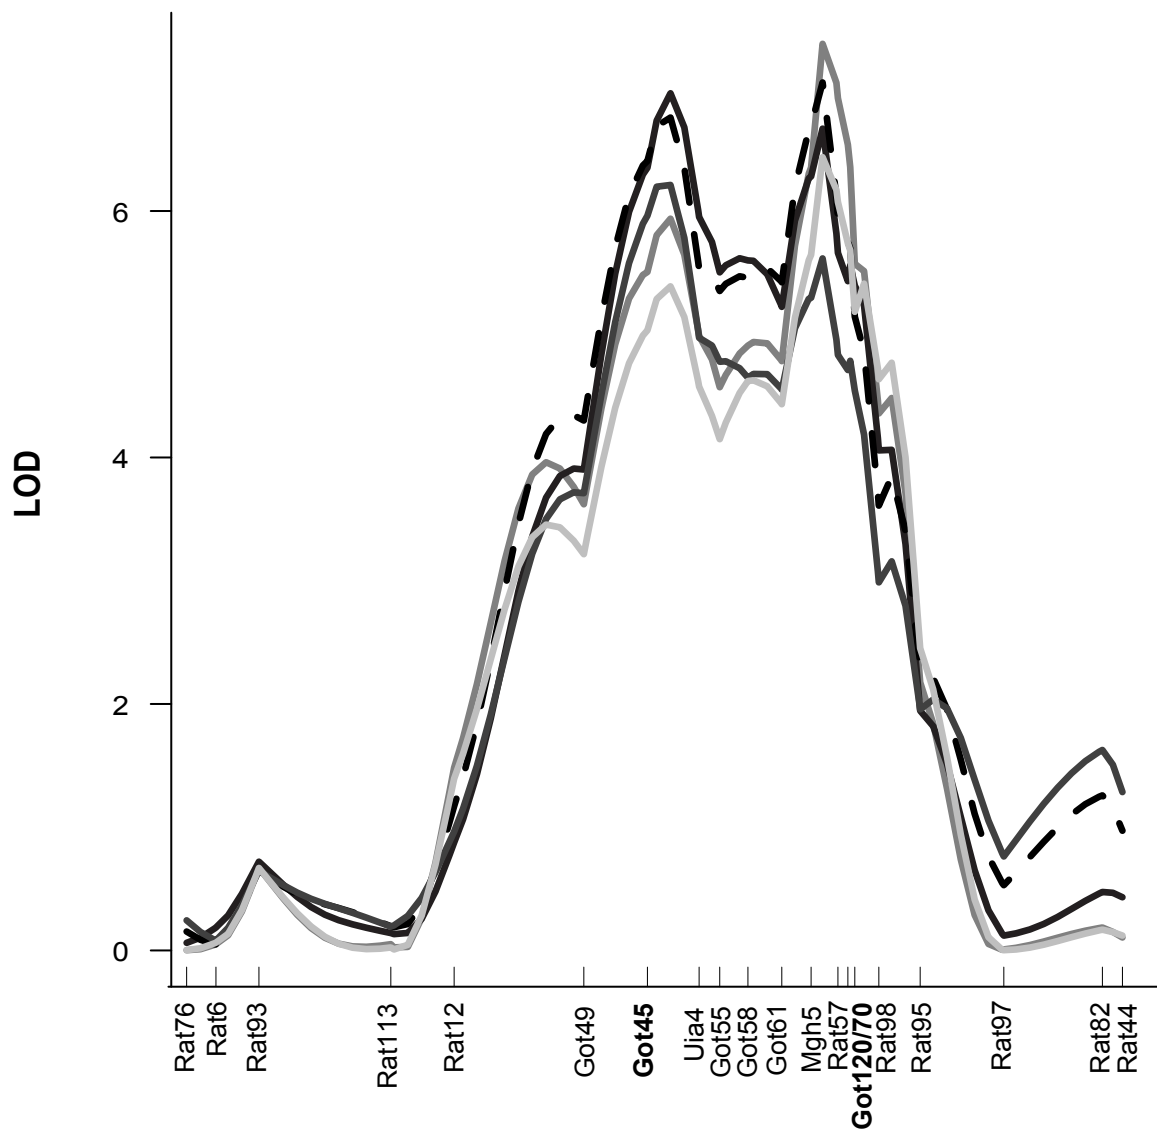

B)

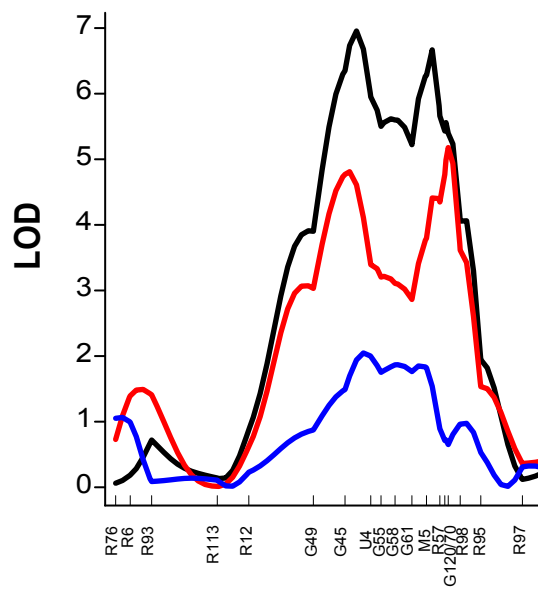

C)

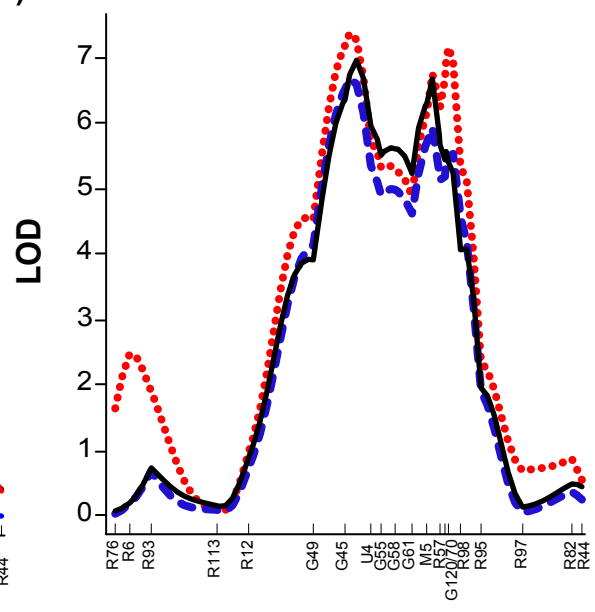

Supplement: pone.0012716.s002.pdf [file pone.0012716.s002.pdf]
